# Supplementary material for: Cesium carbonate as a surface modification material for organic–inorganic hybrid perovskite solar cells with enhanced performance
Source: Royal Society of Chemistry journal article supplement (doi:10.1039/c4ra08565e), 2014-01-01
Supplement: c4ra08565e1.pdf [file c4ra08565e1.pdf]

## Electronic Supplementary Information

### Cesium Carbonate as surface modification material for organic-inorganic hybrid perovskite solar cells with enhanced performance

Haopeng Dong, Xudong Guo, Wenzhe Li and Liduo Wang\*

Key Lab of Organic Optoelectronics and Molecular Engineering of Ministry of Education, Department of Chemistry, Tsinghua University, Beijing, P.R.China. E-mail: chldwang@mail.tsinghua.edu.cn

#### Table of contents

- Table S1. Atomic ratio of films without and with  $\text{Cs}_2\text{CO}_3$  surface modification test by XPS
- Figure S1. XPS result of modified film washed with DI water for three times.
- Figure S2.  $J$ - $V$  curves of perovskite solar cells without and with  $\text{Cs}_2\text{CO}_3$  modification under AM 1.5,  $100\text{mW}/\text{cm}^2$  sun light irradiance.
- Figure S3.  $J$ - $V$  curves of  $\text{Cs}_2\text{CO}_3$  modified perovskite solar cell tested under forward and reverse scan.
- Figure S4. SEM results of perovskite films without and with  $\text{Cs}_2\text{CO}_3$  surface modification.
- Table S2. parameters of (a) control devices and (b) devices modified with  $30\text{mM}$   $\text{Cs}_2\text{CO}_3$ .
- Figure S5. UPS of  $\text{TiO}_2/\text{perovskite}$  and  $\text{TiO}_2/\text{Cs}_2\text{CO}_3/\text{perovskite}$  films

Table S1. Atomic ratio of films without and with  $\text{Cs}_2\text{CO}_3$  surface modification test by XPS

| device                            | Ti <sub>2p</sub> | O <sub>1s</sub> | Cs <sub>3d</sub> |
|-----------------------------------|------------------|-----------------|------------------|
| control                           | 26.89%           | 56.41%          | 0.01%            |
| $\text{Cs}_2\text{CO}_3$ modified | 26.29%           | 56.58%          | 3.84%            |

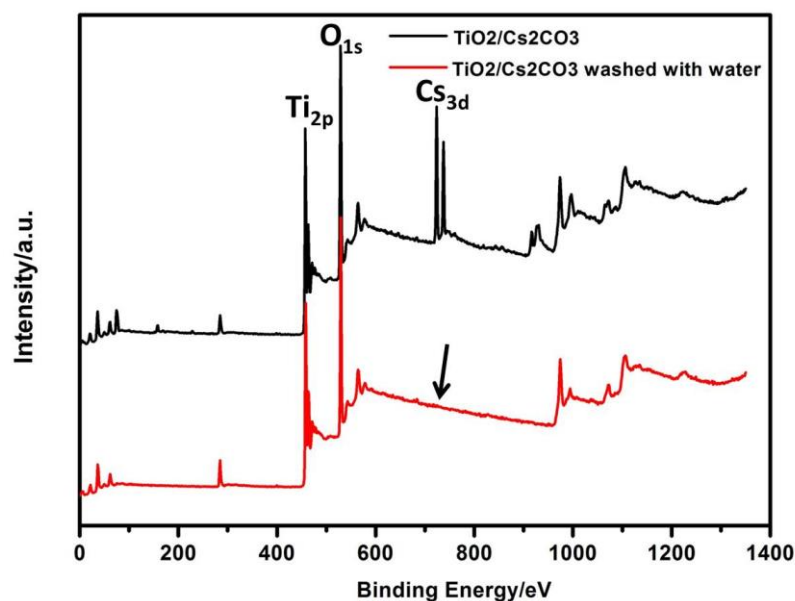

Figure S1. XPS result of modified film washed with DI water for three times.

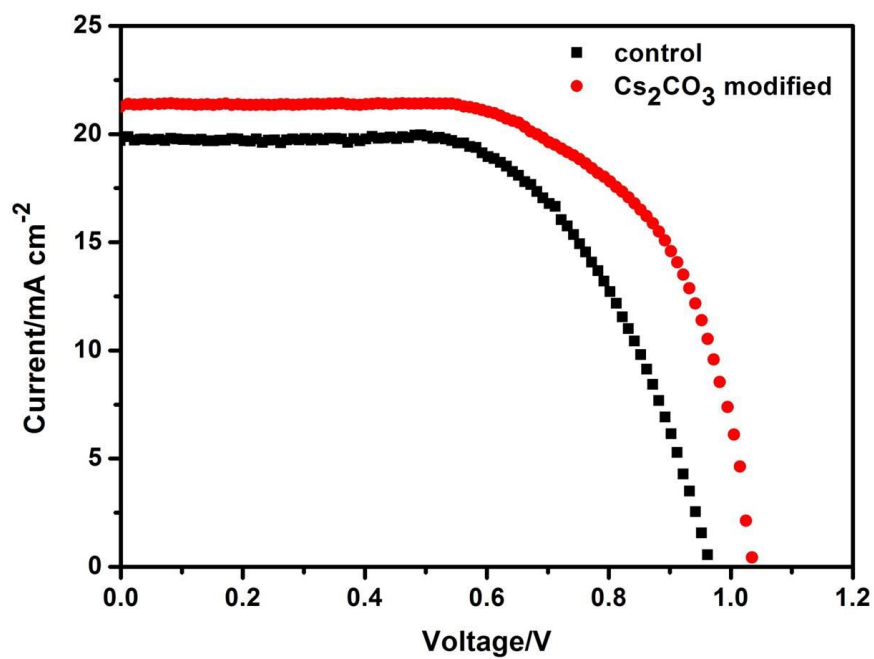

Figure S2. *J-V* curves of perovskite solar cells without and with Cs<sub>2</sub>CO<sub>3</sub> modification under AM 1.5, 100mW/cm<sup>2</sup> sun light irradiance.

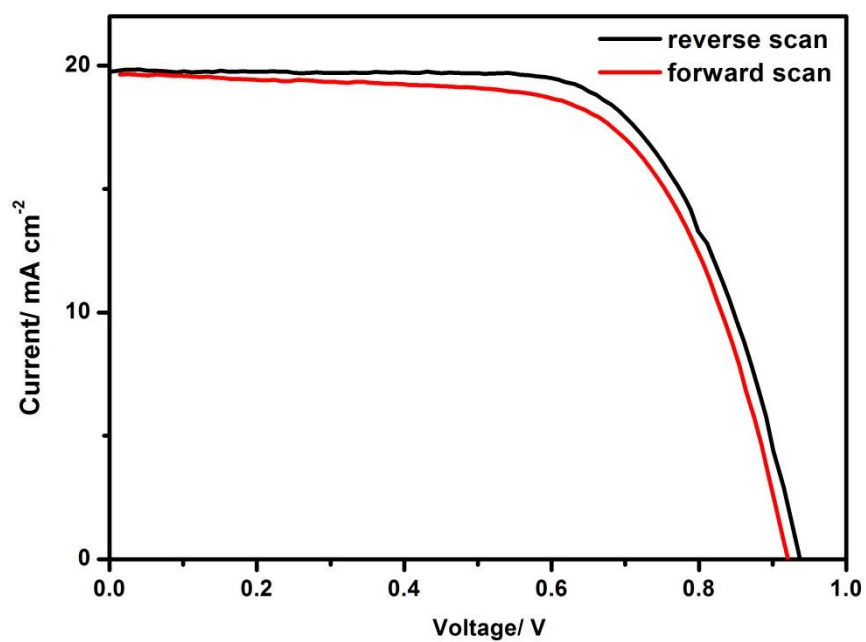

Figure S3. *J-V* curves of Cs<sub>2</sub>CO<sub>3</sub> modified perovskite solar cell tested under forward and reverse scan.

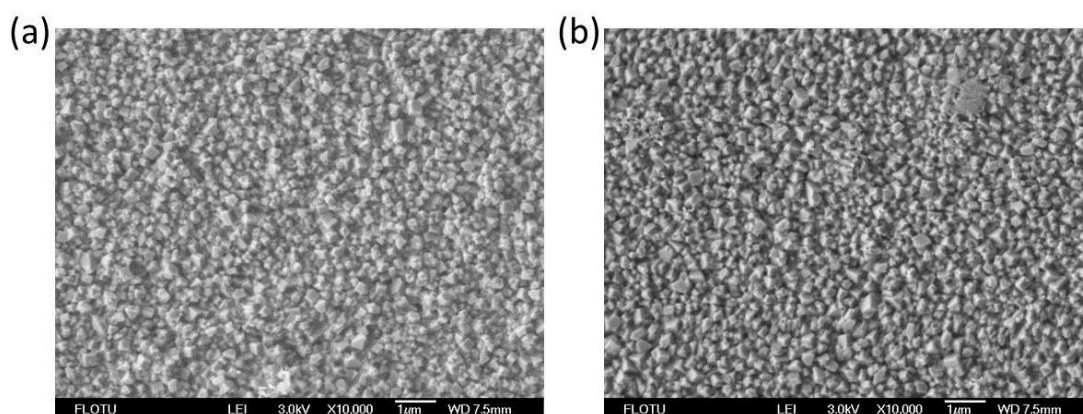

Figure S4. (a),(b) SEM results of perovskite films without and with  $\text{Cs}_2\text{CO}_3$  surface modification respectively;

Table S2. parameters of (a) control devices and (b) devices modified with 30mM  $\text{Cs}_2\text{CO}_3$ .

| a) unmodified | $V_{oc}/\text{V}$ | $J_{sc}/\text{mA cm}^{-2}$ | $FF/\%$ | $\text{PCE}/\%$ |
|---------------|-------------------|----------------------------|---------|-----------------|
| 1             | 0.99              | 20.3                       | 60.7    | 12.2            |
| 2             | 0.95              | 20.6                       | 64.4    | 12.6            |
| 3             | 0.95              | 19.7                       | 63.1    | 11.8            |
| 4             | 0.94              | 18.9                       | 64.7    | 11.5            |
| 5             | 0.94              | 19.6                       | 63.5    | 11.7            |
| 6             | 0.97              | 19.0                       | 64.6    | 11.9            |
| average       | 0.96              | 19.7                       | 63.5    | 12.0            |

| b) modified | $V_{oc}/\text{V}$ | $J_{sc}/\text{mA cm}^{-2}$ | $FF/\%$ | $\text{PCE}/\%$ |
|-------------|-------------------|----------------------------|---------|-----------------|
| 1           | 1.02              | 21.4                       | 61.4    | 13.4            |
| 2           | 1.02              | 20.4                       | 68.2    | 14.2            |
| 3           | 1.05              | 20.0                       | 68.6    | 14.4            |
| 4           | 0.98              | 20.4                       | 65.5    | 13.1            |
| 5           | 1.04              | 21.3                       | 64.1    | 14.2            |
| 6           | 0.98              | 21.5                       | 61.7    | 13.0            |
| average     | 1.02              | 20.8                       | 64.9    | 13.7            |

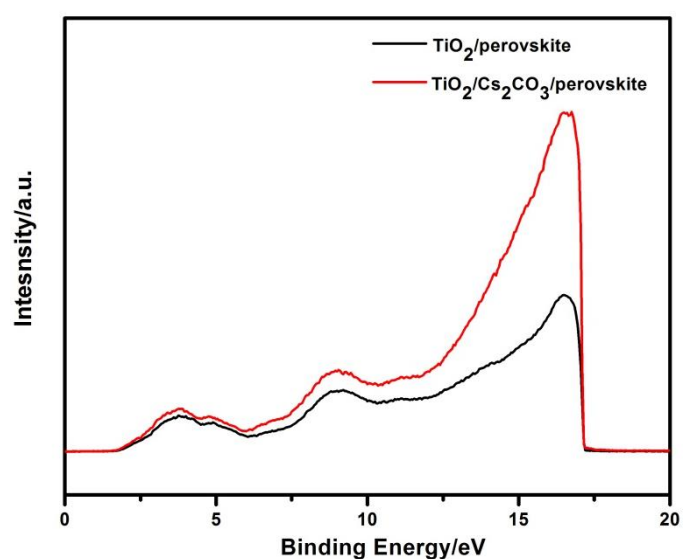

Figure S5. UPS curves of  $\text{TiO}_2/\text{perovskite}$  and  $\text{TiO}_2/\text{Cs}_2\text{CO}_3/\text{perovskite}$  films.
